# Supplementary material for: Nonadiabatic ab initio chemical reaction dynamics for the photoisomerization reaction of 3,5-dimethylisoxazole via the S1 electronic state
Source: Royal Society of Chemistry journal article supplement (doi:10.1039/d4cp03137g), 2024-11-20
Supplement: d4cp03137g1.pdf [file d4cp03137g1.pdf]

## Supporting information

### Nonadiabatic *ab initio* chemical reaction dynamics on photoisomerization reaction of 3,5-dimethylisoxazole via the $S_1$ electronic state

Mizuki Kimura<sup>a</sup> and Shinkoh Nanbu\*<sup>b</sup>

<sup>a</sup> Graduate School of Science and Technology, Sophia University, Japan, Chiyoda, Tokyo 102-8554, Japan. Email: [m-kimura-0o3@eagle.sophia.ac.jp](mailto:m-kimura-0o3@eagle.sophia.ac.jp)

<sup>b</sup> Faculty of Science and Technology, Sophia University, Chiyoda, Tokyo 102-8554, Japan

3,5-dimethylisoxazole cartesian coordinates (Å) at XMS-CASPT2

|   |               |               |               |
|---|---------------|---------------|---------------|
| C | -1.0807968992 | -0.1539346183 | 0.0000413499  |
| O | -0.6956793940 | 1.1154687627  | 0.0002126342  |
| C | 1.1180432032  | -0.0835435722 | 0.0000418655  |
| C | 0.0072335861  | -0.9700101663 | -0.0000731874 |
| H | 0.0119141080  | -2.0458347911 | -0.0002195165 |
| N | 0.7068855225  | 1.1861933694  | 0.0002178806  |
| C | 2.5800859095  | -0.4061675012 | -0.0000002889 |
| H | 2.8465515175  | -0.9892996825 | -0.8830950506 |
| H | 3.1666385010  | 0.5109069911  | 0.0001125293  |
| H | 2.8465596987  | -0.9895446218 | 0.8829170534  |
| C | -2.5518274005 | -0.4113644303 | 0.0000114633  |
| H | -3.0177176837 | 0.0253751514  | -0.8834620528 |
| H | -2.7411160110 | -1.4837469412 | -0.0001352872 |
| H | -3.0177110631 | 0.0251321742  | 0.8836085392  |

3,5-dimethylisoxazole cartesian coordinates (Å) at SA4-CASSCF

|   |               |               |               |
|---|---------------|---------------|---------------|
| C | -1.0837935534 | -0.1563189470 | 0.0000407423  |
| O | -0.6996231333 | 1.1212286737  | 0.0002126098  |
| C | 1.1211549246  | -0.0802075405 | 0.0000418025  |
| C | 0.0062327251  | -0.9709083766 | -0.0000737954 |
| H | 0.0171859222  | -2.0466641533 | -0.0002198474 |
| N | 0.7127128686  | 1.1876898265  | 0.0002184199  |
| C | 2.5828337652  | -0.4058281698 | -0.0000008999 |
| H | 2.8459517777  | -0.9904278277 | -0.8830628445 |
| H | 3.1727419093  | 0.5091853677  | 0.0001148214  |
| H | 2.8459583901  | -0.9906763671 | 0.8828830206  |
| C | -2.5547245554 | -0.4114151366 | 0.0000118302  |
| H | -3.0219810679 | 0.0242015854  | -0.8834272549 |
| H | -2.7436120934 | -1.4841907225 | -0.0001328988 |
| H | -3.0219742844 | 0.0239619114  | 0.8835722108  |

**Table S1(a)** The primary CSF for each state and the squared values of transition dipole moment (TDM) at SA4-CASSCF

| Electronic State | Primary Electronic Configuration                              | TDM <sup>2</sup> / a <sub>0</sub> <sup>2</sup> |
|------------------|---------------------------------------------------------------|------------------------------------------------|
| S <sub>1</sub>   | $Ryd \leftarrow (\pi_{NO} + \pi_{CCC})^*$                     | 0.119                                          |
| S <sub>2</sub>   | $\pi_{NC}^* + \pi_{OC}^* \leftarrow (\pi_{NO} + \pi_{CCC})^*$ | 0.437                                          |
| S <sub>3</sub>   | $\pi_{NC}^* + \pi_{OC}^* \leftarrow (n_N + \sigma_{CO+CC})^*$ | 0.111                                          |

**Table S1(b)** The vertical excitation energy (E<sub>h</sub>)

| Electronic State | XMS-CASPT2/<br>cc-pVDZ + <i>sp</i> | SA4-CASSCF/<br>cc-pVDZ + <i>sp</i> | SAC-CI/<br>aug-cc-pVDZ | SAC-CI/<br>cc-pVTZ |
|------------------|------------------------------------|------------------------------------|------------------------|--------------------|
| S <sub>0</sub>   | -323.01051634                      | -323.53623696                      | -323.262988            | -323.375982        |
| S <sub>1</sub>   | -322.77050436                      | -323.28875461                      | -323.032850            | -323.128486        |
| S <sub>2</sub>   | -322.76137757                      | -323.28280562                      | -323.024065            | -323.120191        |
| S <sub>3</sub>   | -322.74817739                      | -323.26228710                      | -323.007678            | -323.087671        |

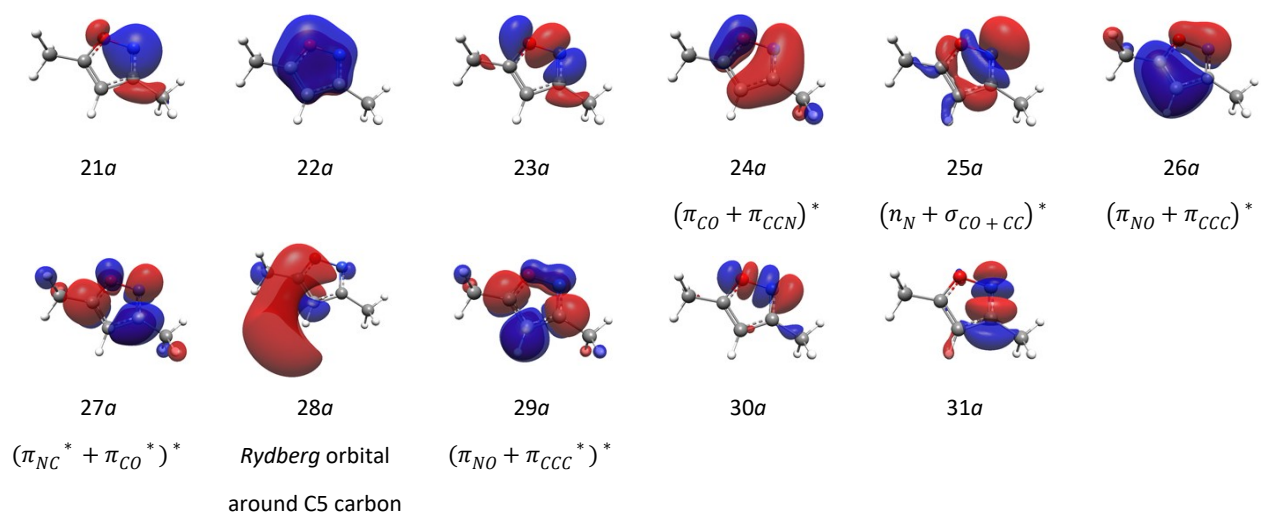

**Fig. S1** The molecular orbitals (MOs) in the active space for SA4-CASSCF

**Table S2(a)** The coefficients of the correlation interaction (CI) for the  $S_0$ ,  $S_1$ ,  $S_2$ , and  $S_3$  states at XMS-CASPT2 level

| Configuration State Function (CSF)           | $S_0$      | $S_1$      | $S_2$      | $S_3$      |
|----------------------------------------------|------------|------------|------------|------------|
| $(24a)^2(25a)^2(26a)^2(27a)^0(28a)^0(29a)^0$ | -0.9387224 | 0.0000001  | -0.0000204 | -0.0433679 |
| $(24a)^2(25a)^2(26a)^1(27a)^0(28a)^1(29a)^0$ | -0.0000001 | 0.9269819  | 0.0040877  | -0.0000004 |
| $(24a)^2(25a)^2(26a)^1(27a)^1(28a)^0(29a)^0$ | 0.0000002  | 0.0041877  | 0.9149561  | -0.0004300 |
| $(24a)^1(25a)^2(26a)^1(27a)^1(28a)^0(29a)^0$ | 0.0866112  | 0.0000018  | -0.0003280 | -0.6938881 |
| $(24a)^1(25a)^2(26a)^2(27a)^0(28a)^0(29a)^1$ | 0.0550695  | 0.0000005  | 0.0001656  | 0.3500992  |
| $(24a)^2(25a)^2(26a)^0(27a)^1(28a)^0(29a)^1$ | -0.0300139 | -0.0000000 | 0.0001544  | 0.3331554  |

**Table S2(b)** The CI coefficients for each electronic state at SA4-CASSCF level

| Configuration State Function (CSF)           | $S_0$      | $S_1$      | $S_2$      | $S_3$      |
|----------------------------------------------|------------|------------|------------|------------|
| $(24a)^2(25a)^2(26a)^2(27a)^0(28a)^0(29a)^0$ | -0.9383068 | 0.0000001  | -0.0439348 | 0.0000123  |
| $(24a)^2(25a)^2(26a)^1(27a)^0(28a)^1(29a)^0$ | -0.0000003 | 0.9267115  | 0.0000040  | 0.0034411  |
| $(24a)^2(25a)^2(26a)^1(27a)^1(28a)^0(29a)^0$ | 0.0850873  | 0.0000037  | -0.7063145 | 0.0001956  |
| $(24a)^1(25a)^2(26a)^2(27a)^1(28a)^0(29a)^0$ | 0.0562196  | 0.0000008  | 0.3372313  | -0.0000930 |
| $(24a)^1(25a)^2(26a)^2(27a)^0(28a)^0(29a)^1$ | -0.0307454 | -0.0000003 | 0.3273773  | -0.0000958 |
| $(24a)^2(25a)^1(26a)^2(27a)^1(28a)^0(29a)^0$ | 0.0000003  | 0.0043313  | 0.0002571  | 0.9139180  |

**Table S3 (a)** The first peak of the histogram of distance in comparison by brute force of structures with non-adiabatic transitions

| (id, Time / fs)             | Distance, $d$ | Probability, $p$ | Geometry1                                                                           | Geometry2                                                                            |
|-----------------------------|---------------|------------------|-------------------------------------------------------------------------------------|--------------------------------------------------------------------------------------|
| (021, 74.75), (495, 114.25) | 3.24          | 0.92, 0.88       |   |   |
| (133, 77.75), (385, 372.00) | 3.19          | 1.00, 0.92       |   |   |
| (159, 50.00), (531, 128.00) | 3.24          | 1.00, 0.99       |   |   |
| (397, 55.00), (487, 512)    | 3.24          | 0.96, 0.96       |   |   |
| (417, 82.00), (495, 114.25) | 3.15          | 1.00, 0.88       |  |  |

**Table S3 (b)** The second peak of the histogram of distance in comparison by brute force of structures with non-adiabatic transitions

| (id, Time / fs)              | Distance, $d$ | Probability, $p$ | Geometry1                                                                          | Geometry2                                                                            |
|------------------------------|---------------|------------------|------------------------------------------------------------------------------------|--------------------------------------------------------------------------------------|
| (105, 343.50), (257, 71.75)  | 6.62          | 0.97, 0.68       |   |   |
| (151, 26.00), (403, 127.75)  | 6.62          | 0.97, 0.87       |   |   |
| (181, 53.50), (293, 77.25)   | 6.61          | 0.88, 0.84       |   |   |
| (263, 216.75), (429, 138.50) | 6.63          | 0.97, 0.92       |   |   |
| (443, 87.00), (595, 261.50)  | 6.67          | 0.29, 0.93       |  |  |

**Table S4** (a) The primary peak around  $d=18.03$ 

| (id, Time / fs) | Distance, $d$ | Probability, $p$ | Geometry                                                                            |
|-----------------|---------------|------------------|-------------------------------------------------------------------------------------|
| (021, 132.75)   | 18.15         | 0.54             | 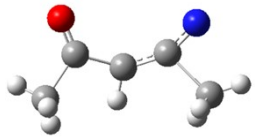  |
| (095, 67.75)    | 18.21         | 0.98             |   |
| (185, 320.00)   | 18.17         | 0.61             |   |
| (203, 64.00)    | 17.90         | 0.96             |   |
| (231, 413.00)   | 18.06         | 0.98             |  |



**Table S4** (b) The subsidiary peak around  $d = 9.98$

| (id, Time / fs) | Distance, $d$ | Probability, $p$ | Geometry                                                                            |
|-----------------|---------------|------------------|-------------------------------------------------------------------------------------|
| (011, 24.00)    | 9.98          | 0.84             | 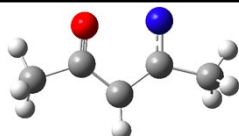  |
| (349, 21.25)    | 9.91          | 0.95             |   |
| (145, 25.00)    | 10.07         | 0.54             |   |
| (157, 18.00)    | 9.87          | 1.00             |   |
| (519, 19.75)    | 10.09         | 0.98             |  |

**Table S4 (c)** Time-resolved histograms.

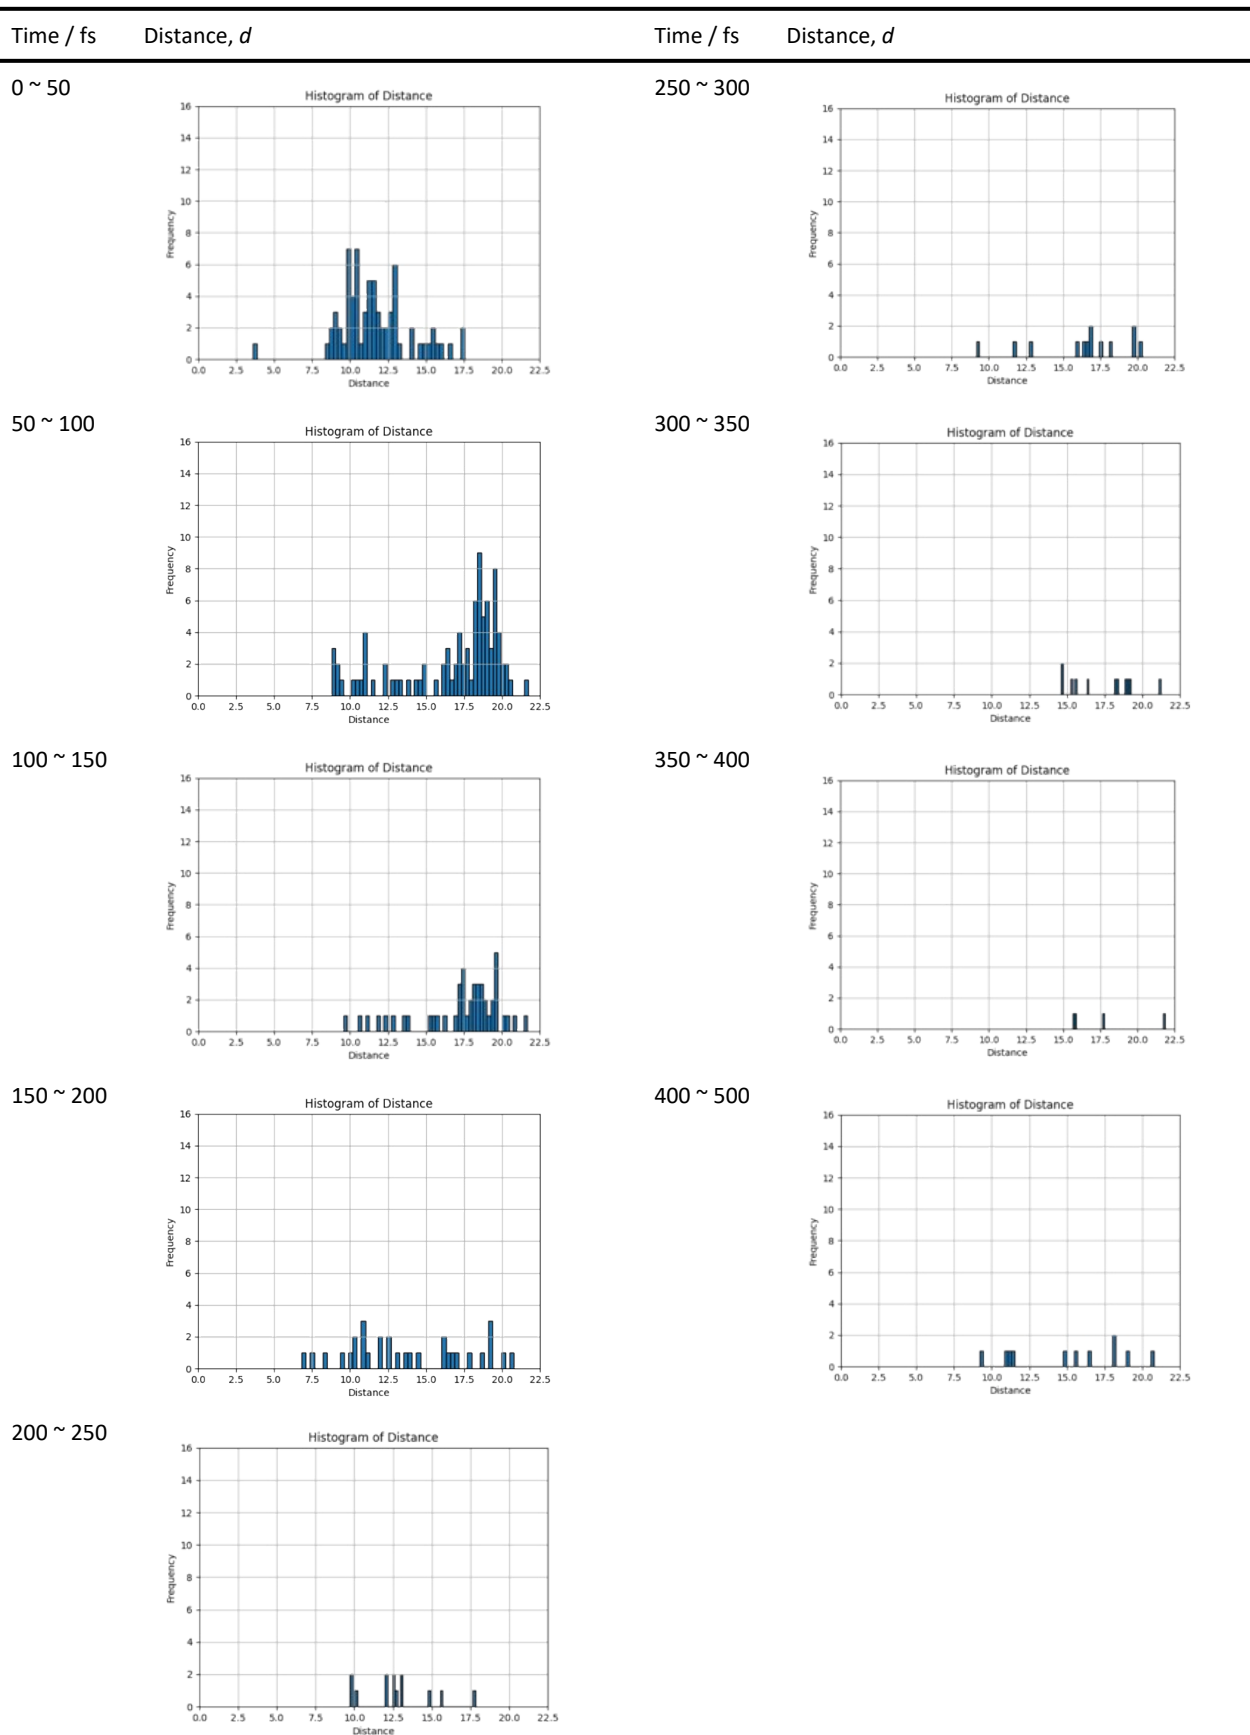



(a)

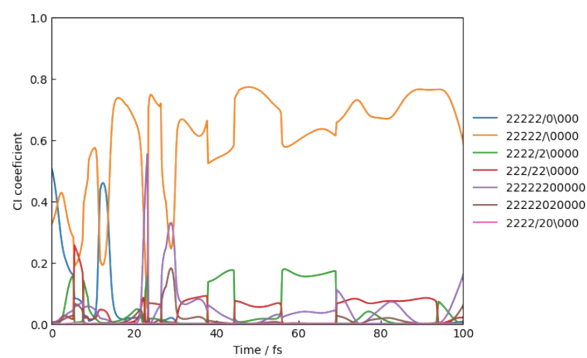

(b)

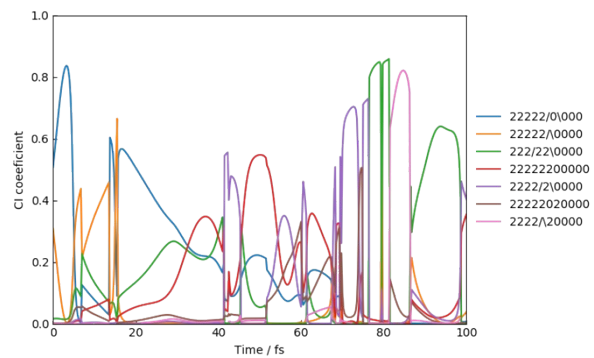

**Fig. S2** (a) and (b) are time variations of the CI-coefficients between 100 fs corresponding to Figures 6(b) and 6(d).

**Table S5** (a) The time variation for molecular orbitals on the trajectory producing azirine after photoexcitation

| Time / fs | 26a                                                                               | 27a                                                                               | 28a                                                                                |
|-----------|-----------------------------------------------------------------------------------|-----------------------------------------------------------------------------------|------------------------------------------------------------------------------------|
| 0.00      | 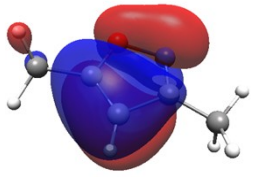 |  |  |
| 10.0      |  |  |  |

**Table S5(b)** The time variation for molecular orbitals on the trajectory producing azirine

| Time / fs | 26a                                                                                 | 27a                                                                                 |
|-----------|-------------------------------------------------------------------------------------|-------------------------------------------------------------------------------------|
| 18.75     | 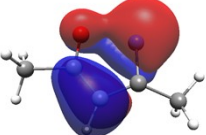   |    |
| 22.50     |    |    |
| 23.50     |    |    |
| 25.00     |    |    |
| 50.00     |   |   |
| 100.00    |  |  |
| 150.00    |  |  |
| 250.00    |  |  |

**Table S5(c)** The time variation for molecular orbitals on the trajectory producing azirine after photoexcitation

| Time / fs | 24a                                                                                 | 25a                                                                                 | 26a                                                                                 | 27a                                                                                  | 28a                                                                                   |
|-----------|-------------------------------------------------------------------------------------|-------------------------------------------------------------------------------------|-------------------------------------------------------------------------------------|--------------------------------------------------------------------------------------|---------------------------------------------------------------------------------------|
| 0.00      | 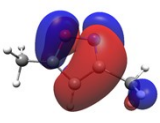   |    |    |    |    |
| 15.50     |    |    |    |    |    |
| 68.25     |    |    |    |    |    |
| 69.75     |   |   |   |   |   |
| 74.75     |  |  |  |  |  |
| 79.50     |  |  |  |  |  |
| 86.50     |  |  |  |  |  |
| 104.75    |  |  |  |  |  |

(a)

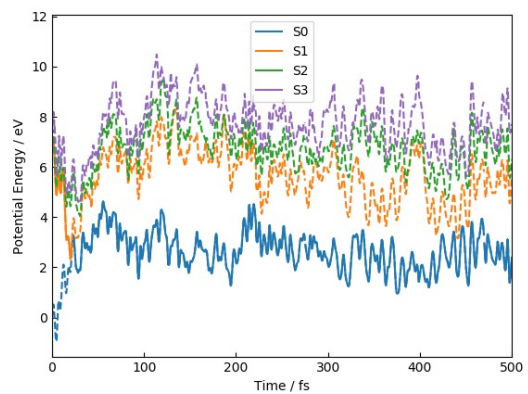

(b)

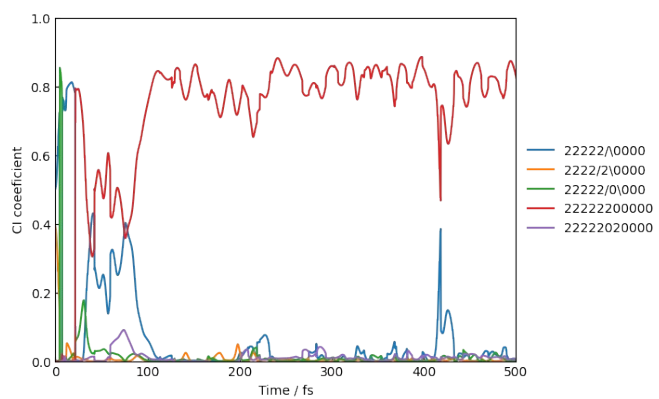

**Fig. S3** The isomerization pathways to nitrile ylide product at XMS-CASPT2 level: (a) the potential energies of four electronic states over the time evolution, and (b) CI coefficients over the same time are shown. The legends used in (b) is mentioned in **Fig. 6**.



**Table S6(a)** The time variation for molecular orbitals on the trajectory producing nitrile ylide and oxazole

| Time / fs | 26a                                                                                 | 27a                                                                                 | 28a                                                                                  |
|-----------|-------------------------------------------------------------------------------------|-------------------------------------------------------------------------------------|--------------------------------------------------------------------------------------|
| 0.00      | 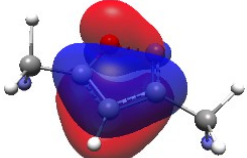   |    |    |
| 4.75      |    |    |    |
| 7.25      |    |    |    |
| 7.50      |  |  |  |

**Table S6(b)** The time variation for molecular orbitals on the trajectory producing nitrile ylide and oxazole

| Time / fs | 26a                                                                               | 27a                                                                               |
|-----------|-----------------------------------------------------------------------------------|-----------------------------------------------------------------------------------|
| 21.50     | 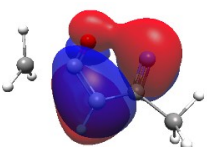 |  |
| 76.00     |  |  |

**Table S6(c)** The time variation for molecular orbitals on the trajectory producing nitrile ylide

| Time / fs | 26a                                                                               |
|-----------|-----------------------------------------------------------------------------------|
| 150.00    | 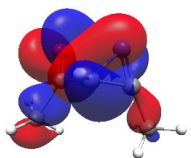 |
| 175.00    |  |
| 200.00    |  |

**Table S6(d)** The time variation for molecular orbitals on the trajectory producing oxazole

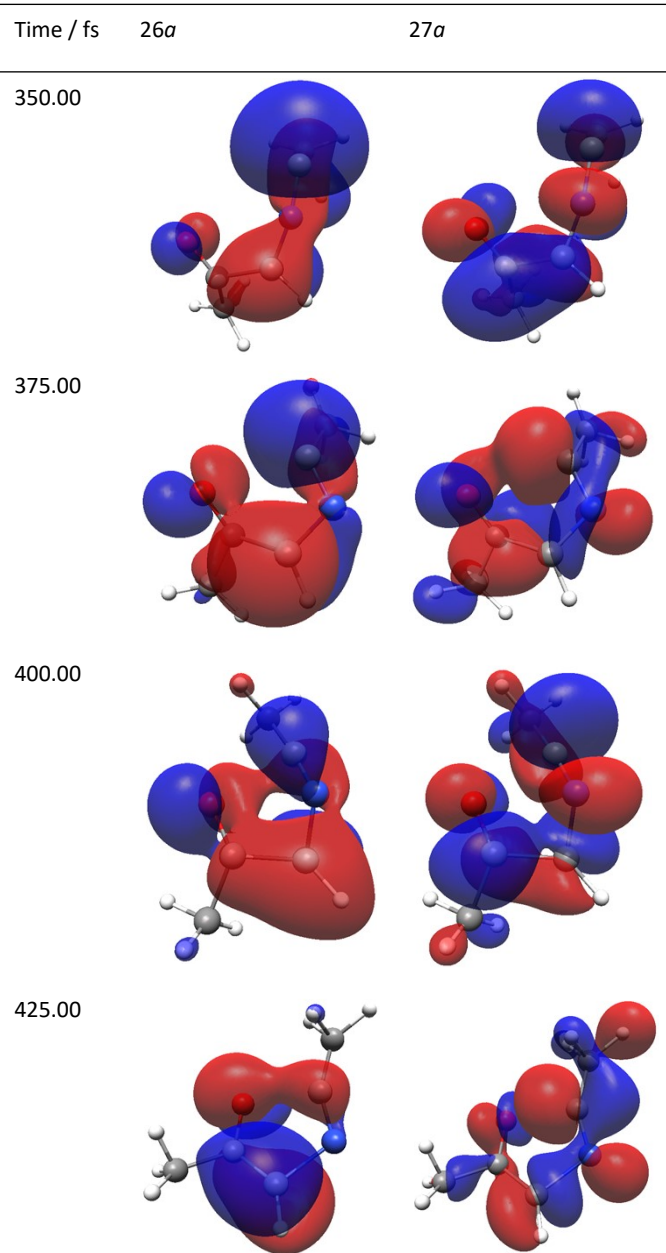

**Table S7(a)** The time variation for molecular orbitals on the trajectory producing ketenimine

| Time/ fs | 24a                                                                                 | 25a                                                                                 | 26a                                                                                 | 27a                                                                                  | 28a                                                                                   |
|----------|-------------------------------------------------------------------------------------|-------------------------------------------------------------------------------------|-------------------------------------------------------------------------------------|--------------------------------------------------------------------------------------|---------------------------------------------------------------------------------------|
| 0.00     | 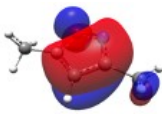   |    |    |    |    |
| 16.75    |    |    |    |    |    |
| 28.25    |    |    |    |    |    |
| 55.75    |    |    |    |    |    |
| 65.00    |   |   |   |   |   |
| 92.50    |  |  |  |  |  |
| 361.75   |  |  |  |  |  |

**Table S7(b)** The time variation for molecular orbitals on the trajectory migrating the methyl group.

| Time / fs | 25a                                                                               | 26a                                                                               | 27a                                                                               | 28a                                                                                 |
|-----------|-----------------------------------------------------------------------------------|-----------------------------------------------------------------------------------|-----------------------------------------------------------------------------------|-------------------------------------------------------------------------------------|
| 375.00    | 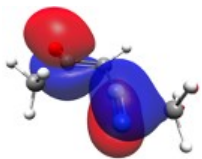 |  |  |  |
| 400.00    |  |  |  |  |

(a)

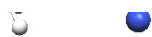

(b)

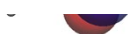

26a

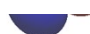

27a

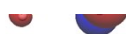

28a

(c)

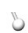

4a

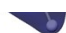

10a

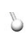

15a

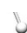

17a

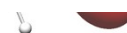

24a

(d)

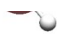

1a

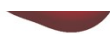

2a

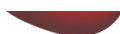

3a

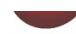

4a

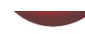

5a

**Fig. S4** The methyl shift, (a) the optimized geometry of conical intersection, (b) MOs at the optimized conical intersection, (c) MOs for the methyl migration in our trajectory, and (d) MOs for methyl radical only

**Table S8** The other products

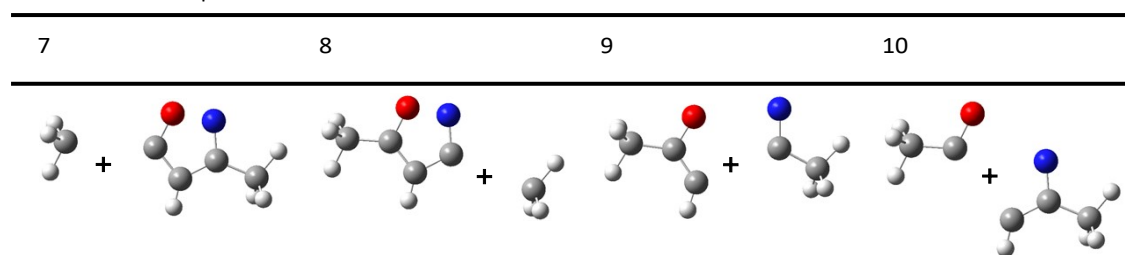

(a)

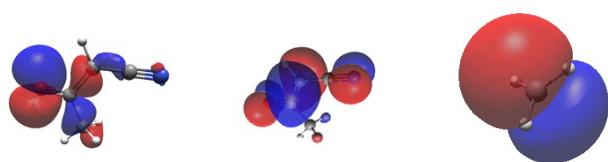

25a

26a

27a

(b)

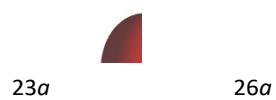

23a

26a

(c)

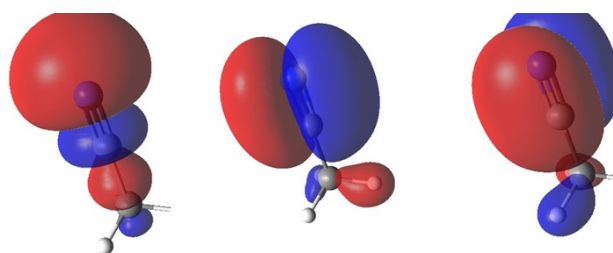

9a

10a

11a HOMO

**Fig. S5** The molecular orbitals for the other products for (a) the C3-C7 bond dissociation, (b) CH<sub>3</sub>CN + CH<sub>3</sub>CCO, and (c) CH<sub>3</sub>CN



**Table S9** The time variation of molecular orbitals for producing acetonitrile and 1,2 -shift

| Time / fs | 26a                                                                                 | 27a                                                                                 |
|-----------|-------------------------------------------------------------------------------------|-------------------------------------------------------------------------------------|
| 24.00     | 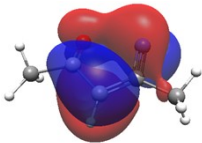   |    |
| 25.00     |    |    |
| 50.00     |    |    |
| 75.00     |   |   |
| 81.25     |  |  |
| 87.50     |  |  |
| 93.75     |  |  |
| 100.00    |  |  |
